# Supplementary material
Source: MDPI journal article supplement (https://www.mdpi.com/2073-4352/11/3/288)
Supplement: s1 [file s1]

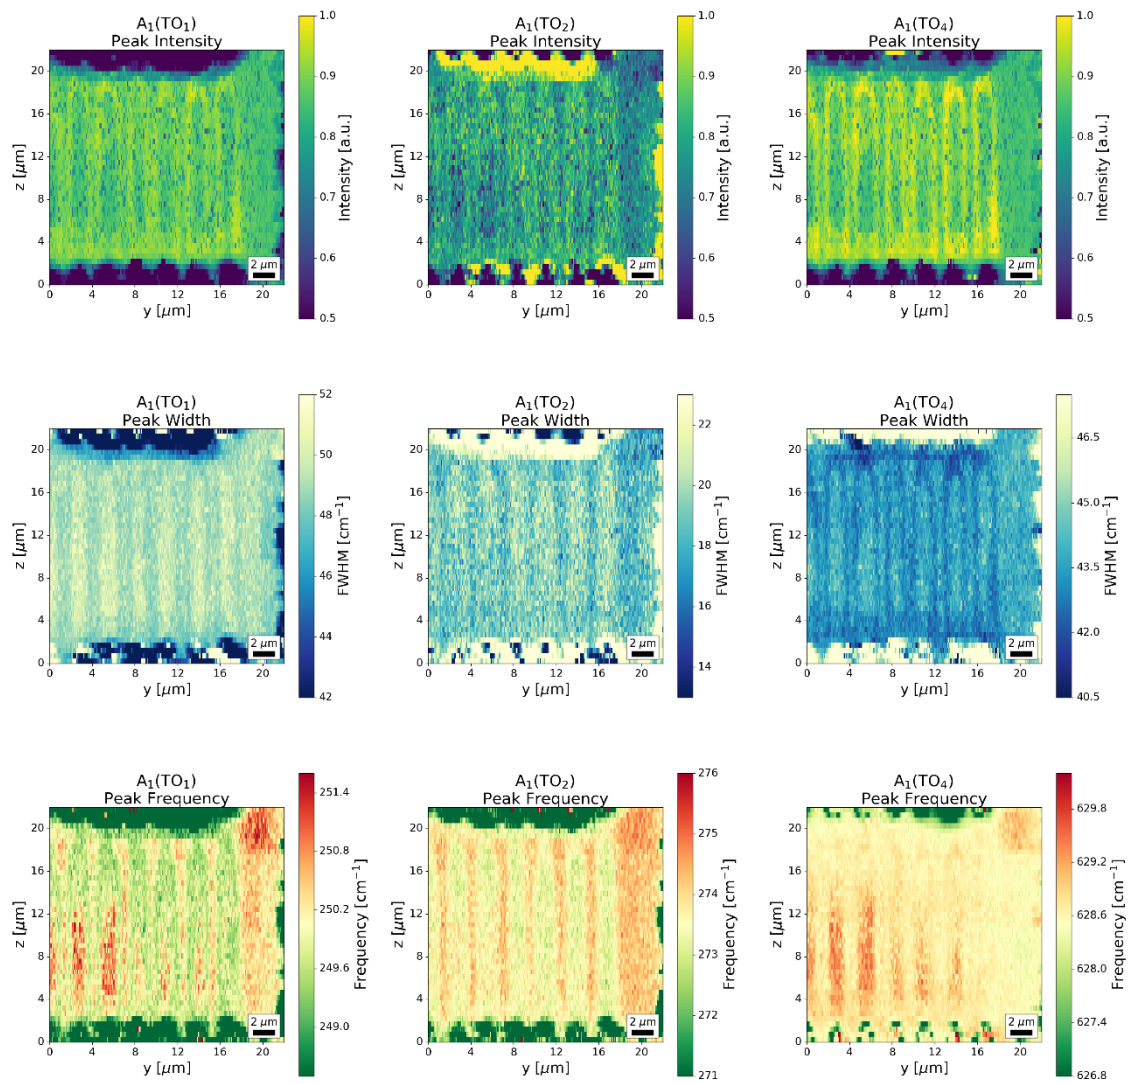

**Figure S1** Complete set of colormaps generated from frequencies, intensities and peak widths of the analyzed  $A_1(\text{TO})$  phonon modes in TFLN.
